# Supplementary material for: Single-cell and Multi-omics Analysis Confirmed the Signature and Potential Targets of Cuproptosis in Colorectal Cancer
Source: PubMed Central journal article supplement (PMC11786029; doi:10.7150/jca.104702), 2025-01-13
Supplement: jcav16p1264s1.pdf [file jcav16p1264s1.pdf]

# Supplementary Material

Supplementary Figure 1. Clustering analysis of cuproptosis-associated genes.

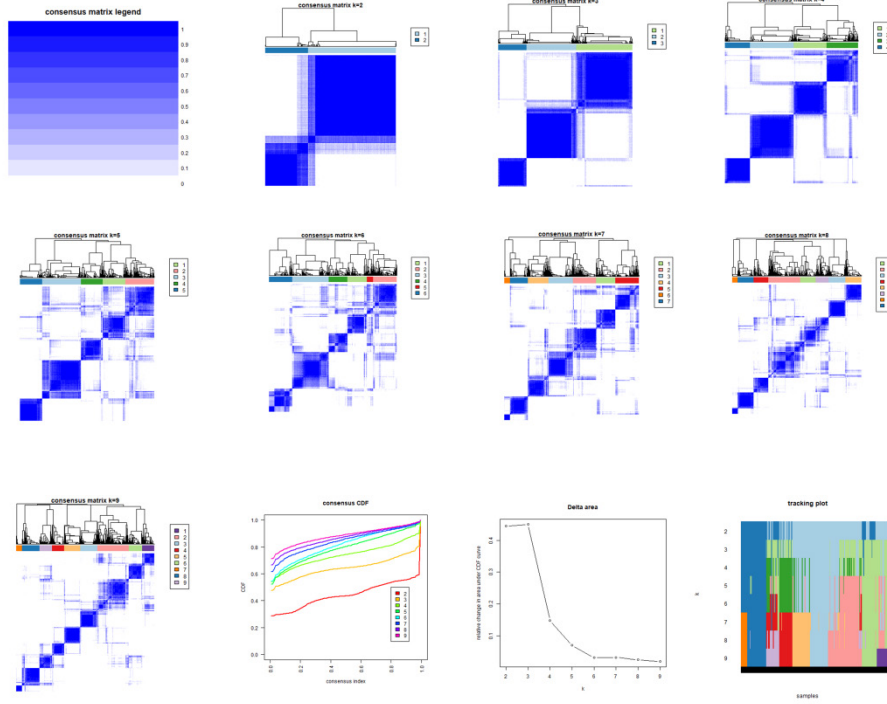

**Supplementary Figure 2.** Venn diagram of significantly differentially expressed genes in cuproptosis typing.

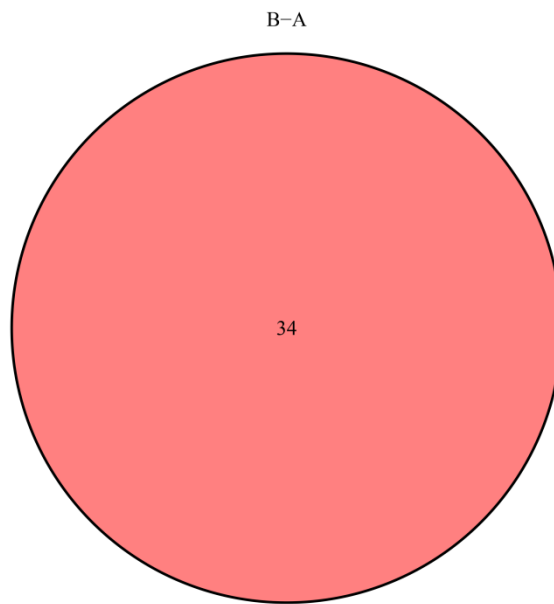

Supplementary Figure 3. Clustering analysis of differentially expressed genes.

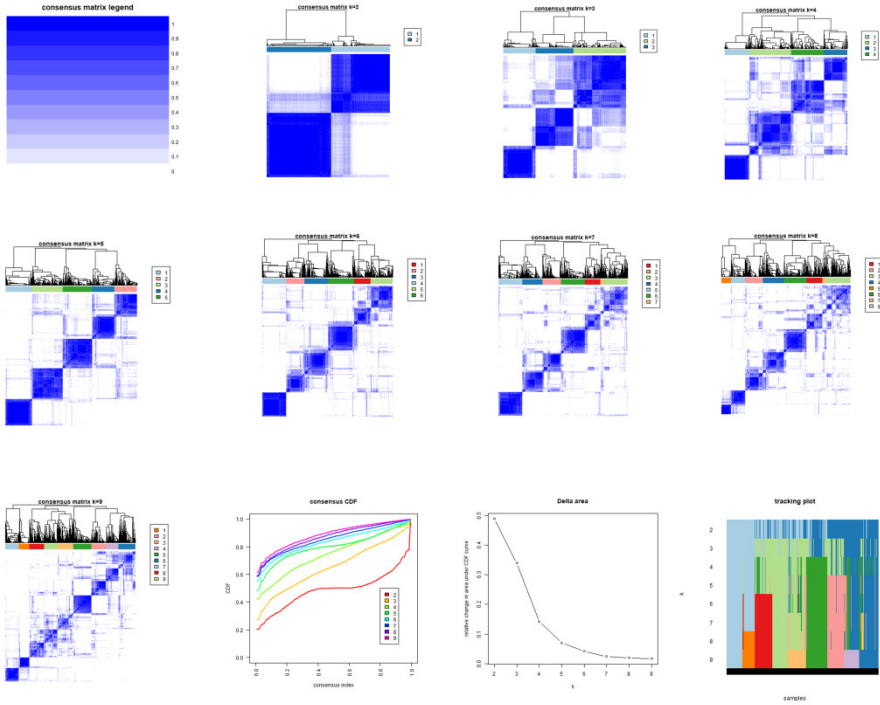

**Supplementary Figure 4.** Changes in the concordance index for survival prediction between risk models and different clinical factors.

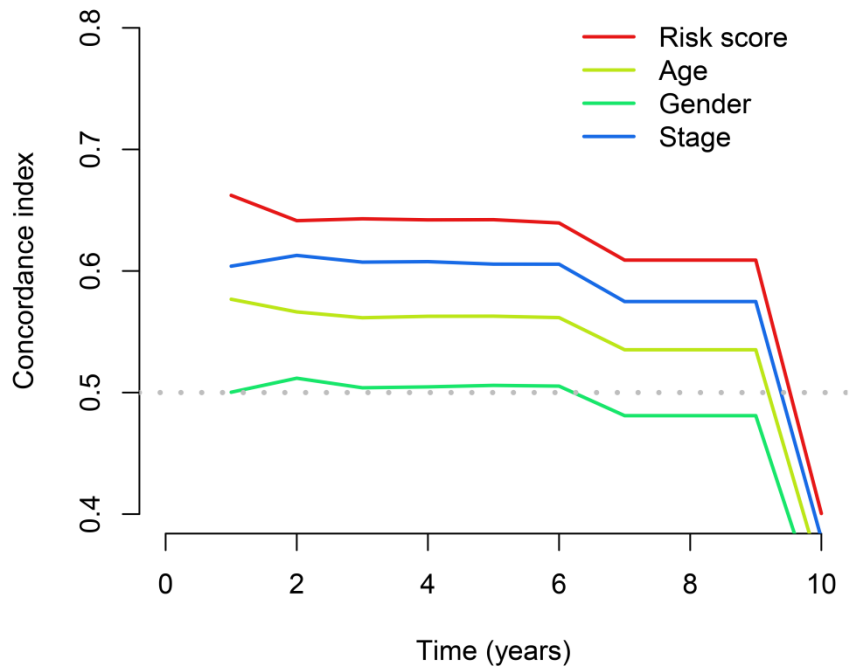



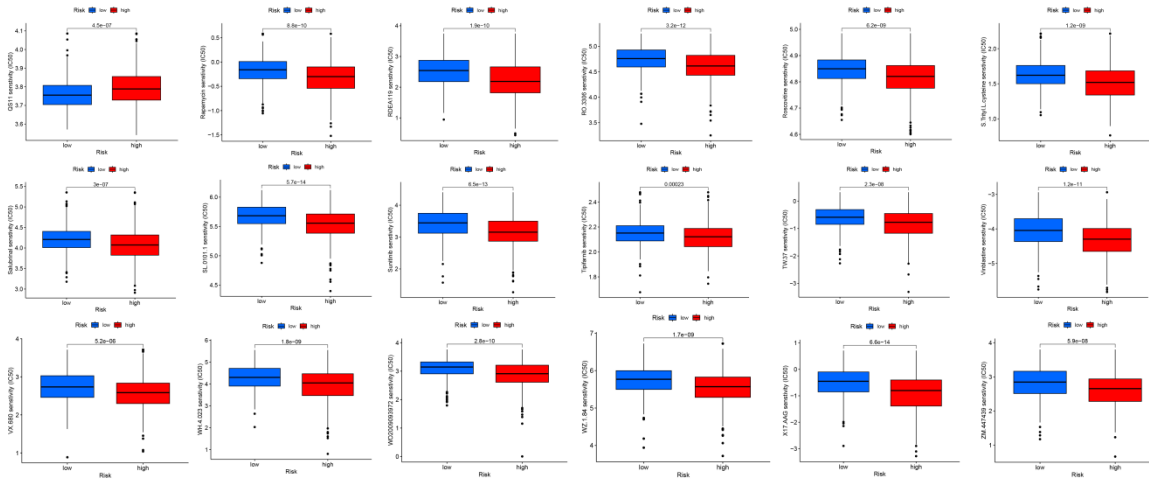

**Supplementary Figure 6.** A-B Proportions of different cell types in single-cell analysis. C Violin plot of single-cell expression of hub genes.

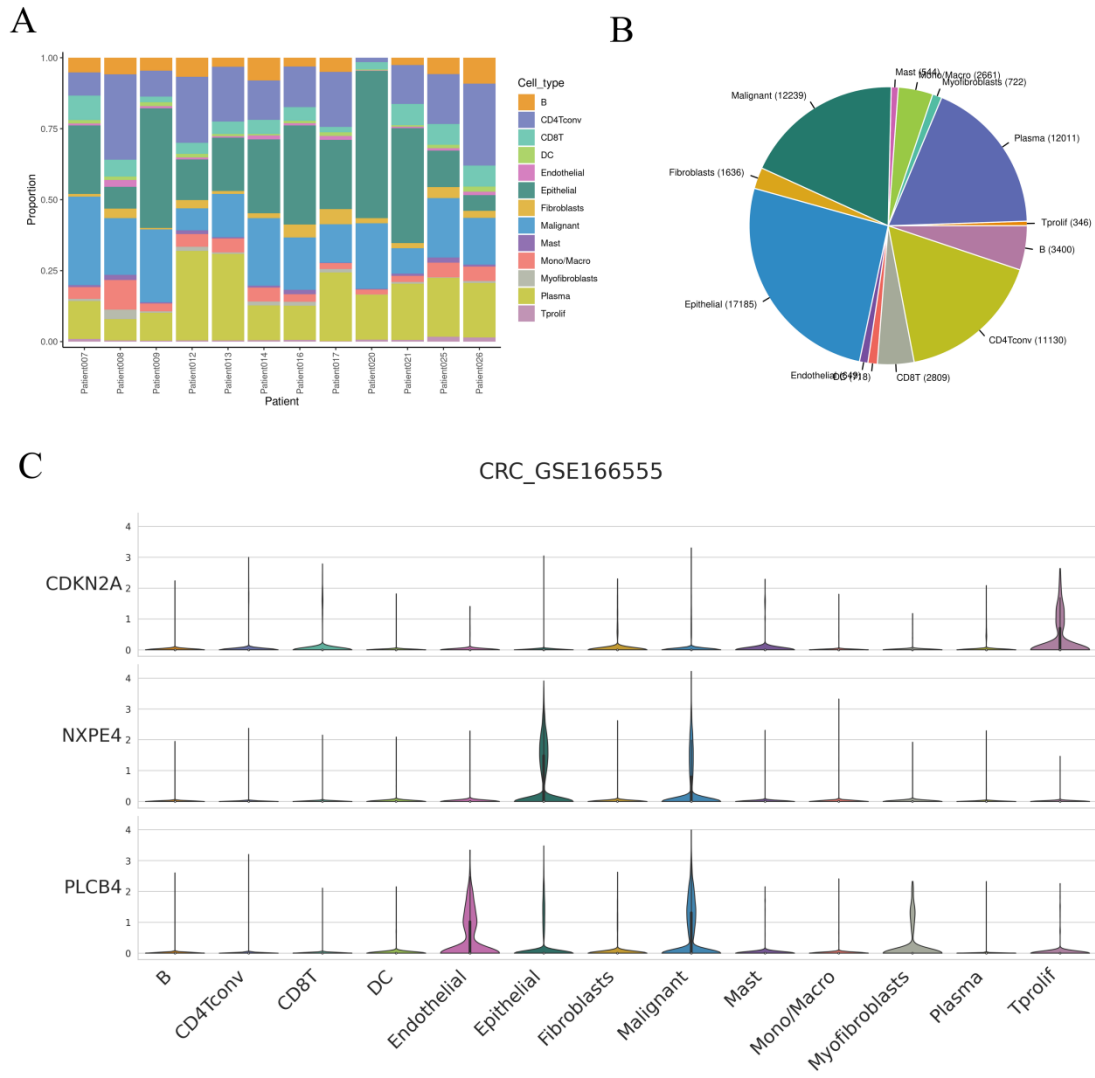

**Supplementary Table 1.** Primers

---

| Gene symbol   | Primer sequence                                  |
|---------------|--------------------------------------------------|
| <i>CDKN2A</i> | F:CGATGTCGCACGGTACCTG<br>R:GACCTTCCGCGGCATCTATG  |
| <i>PLCB4</i>  | F:GCATGATGGAAGCTGGAGAA<br>R:CTTCCTCCTCTTGGTCAGCA |
| <i>NXPE4</i>  | F:AGATCCCACCCAGACCTTTC<br>R:CCTGCAGTACGTATCTCGAG |

---
